# Supplementary material for: Electrocatalytic behavior of amino compound oxidation on NiCo catalyst and energy conversion
Source: Royal Society of Chemistry journal article supplement (doi:10.1039/d3ya00368j), 2023-01-01
Supplement: d3ya00368j1.pdf [file d3ya00368j1.pdf]

Supplementary Information for  
**Electrocatalytic behavior of amino compounds oxidation on  
NiCo catalyst and energy conversion**

Wei Xu<sup>1,\*</sup>, Zhaozhao Yan<sup>2</sup>, Chunhong Liu<sup>1</sup>, Xu Yang<sup>3</sup>, Hua Yu<sup>2</sup>, Hongchao Chang<sup>2</sup>,  
Jiarong Zang<sup>2</sup>, Guangyao Xu<sup>2</sup>, Du Linmin<sup>4</sup>, Binbin Yu<sup>2,\*</sup>

1. Zhejiang Baima Lake Laboratory Co., Ltd, Hangzhou 310053, P.R. China;
2. School of Pharmaceutical and Chemical Engineering, Taizhou University,  
Taizhou 318000, P.R. China;
3. Department of Environmental Engineering, State Key Laboratory of Clean Energy  
Utilization, Zhejiang University, Hangzhou 310058, P. R. China;
4. Taizhou Research and Design Institute of Environmental Science, Taizhou  
318000, P.R. China;

\* Correspondence: 21114078@zju.edu.cn (W.X.); yubinbin2004@126.com (B.Y.).

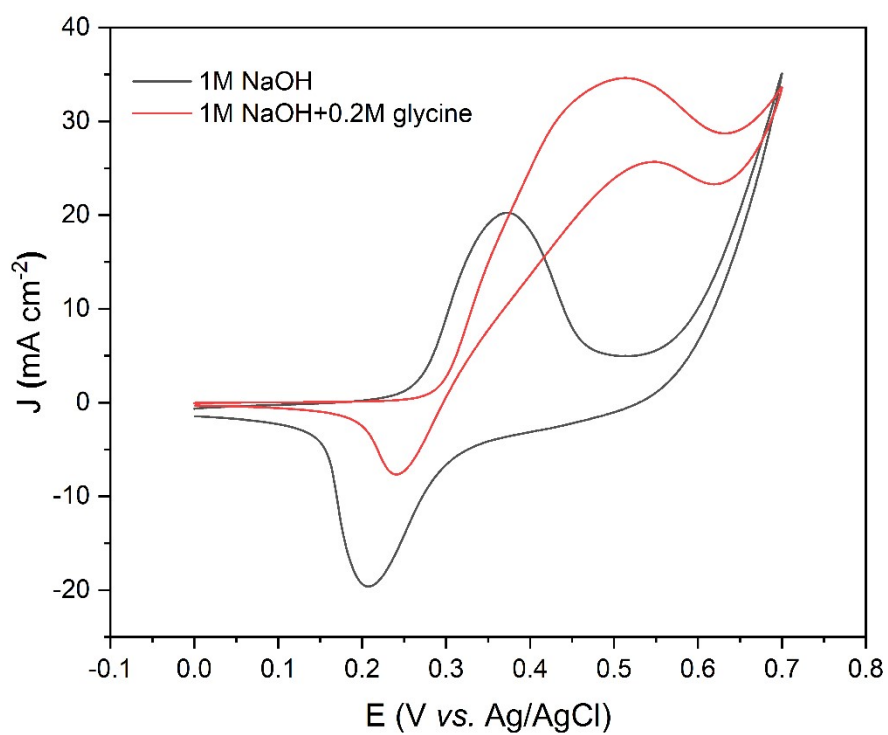

**Supplementary Figure S1** CVs of NiCo/C catalysts in 1 M NaOH electrolyte with absence and presence of 0.2 M glycine at scan rate of 50 mV s<sup>-1</sup>.

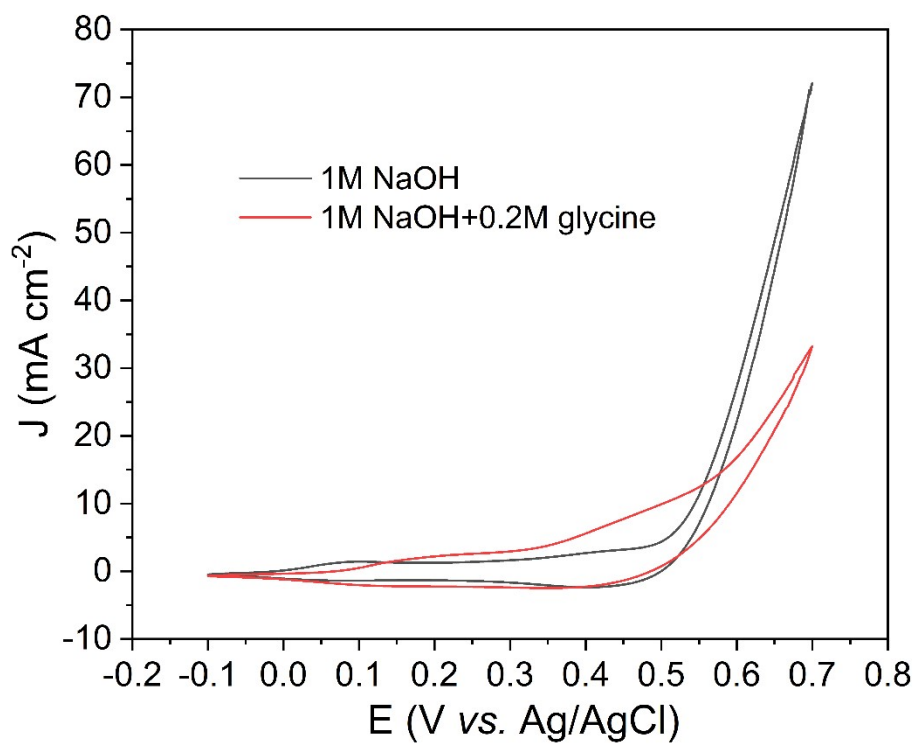

**Supplementary Figure S2** CVs of Co/C catalyst in 1 M NaOH electrolyte with absence and presence of 0.2 M glycine at scan rate of 50 mV s<sup>-1</sup>.

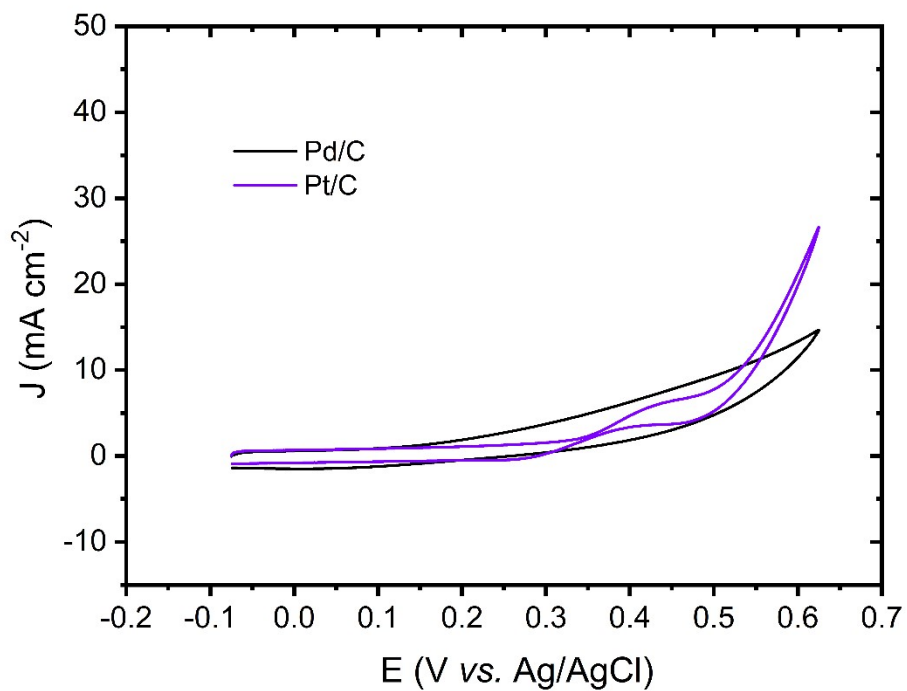

**Supplementary Figure S3** Cyclic voltammetry of commercial 20 wt% Pt/C and 20 wt% Pd/C in 1 M NaOH with 0.2 M Gly at a scan rate of 50 mV s<sup>-1</sup>. The loadings of Pd and Pt on GCE were both about 0.18 mg cm<sup>-2</sup>.

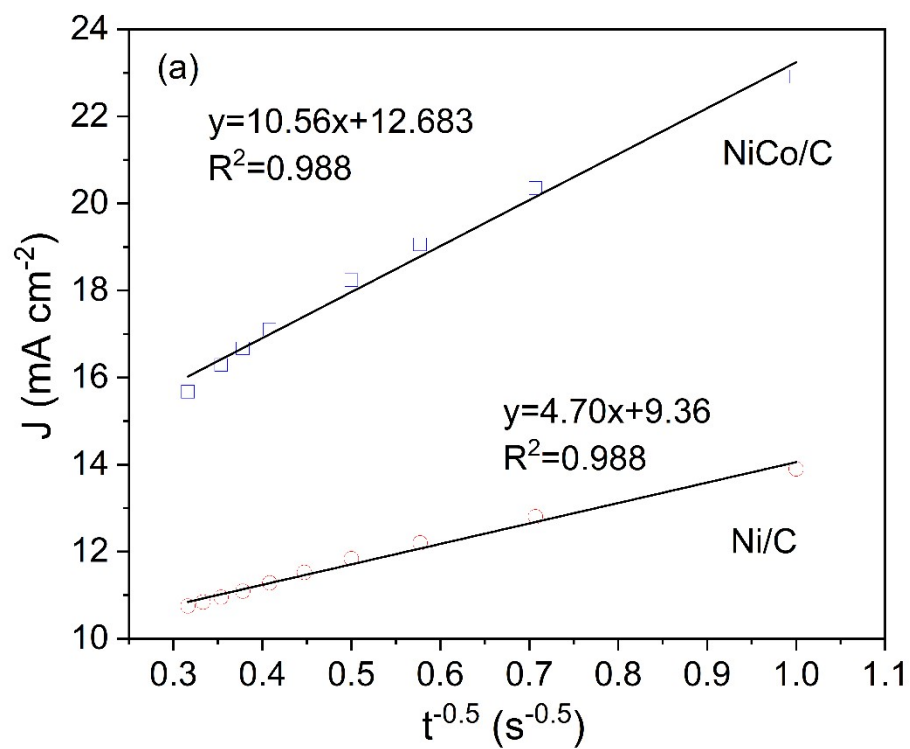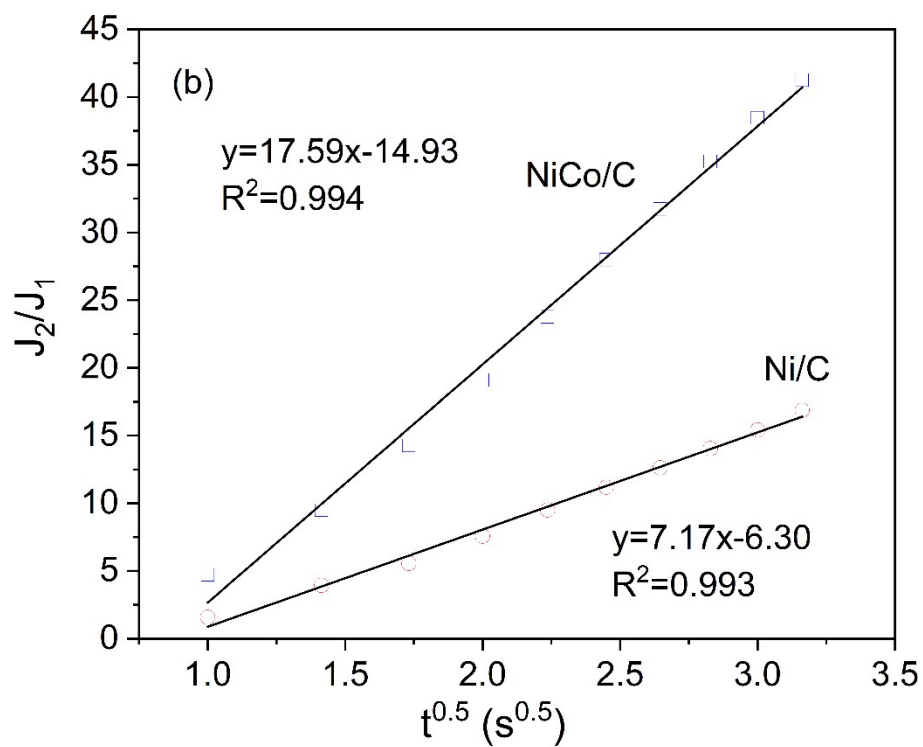

**Supplementary Figure S4** (a) Dependence of current density ( $J$ ) on  $t^{-1/2}$  in 1 M NaOH with 0.2 M glycine. (b) Dependence of  $J_2/J_1$  on  $t^{1/2}$ . Data are from chronoamperograms plots in Figure 4b.

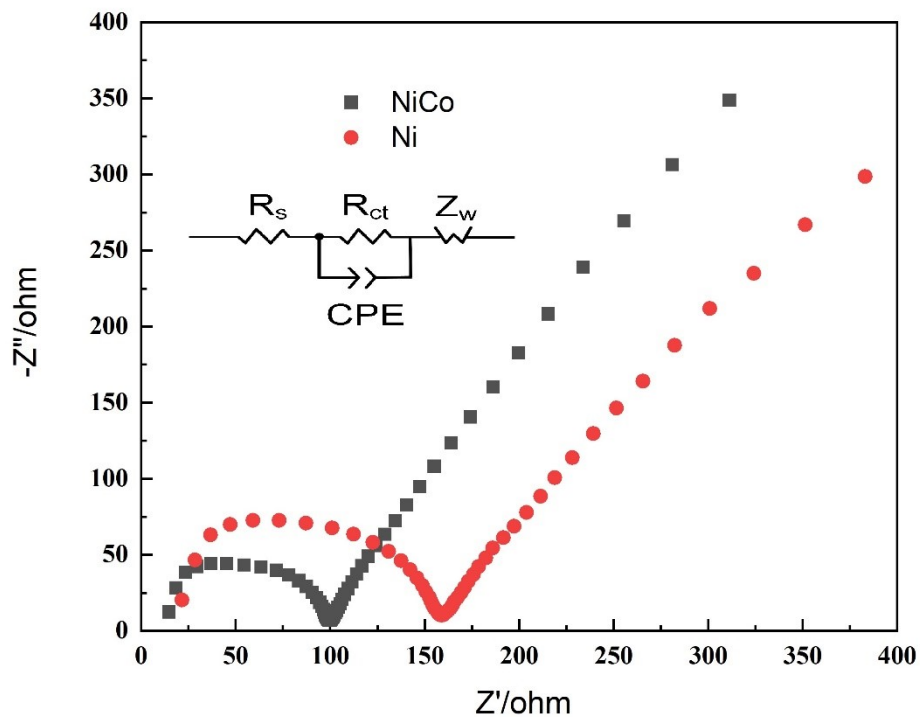

**Supplementary Figure S5.** Nyquist diagrams of Ni and NiCo on glassy carbon electrode recorded at 0.45 V vs. Ag/AgCl in 1M NaOH solution with 0.2 M glycine. Inset scheme of an equivalent circuit model to mimic the electrochemical reaction.

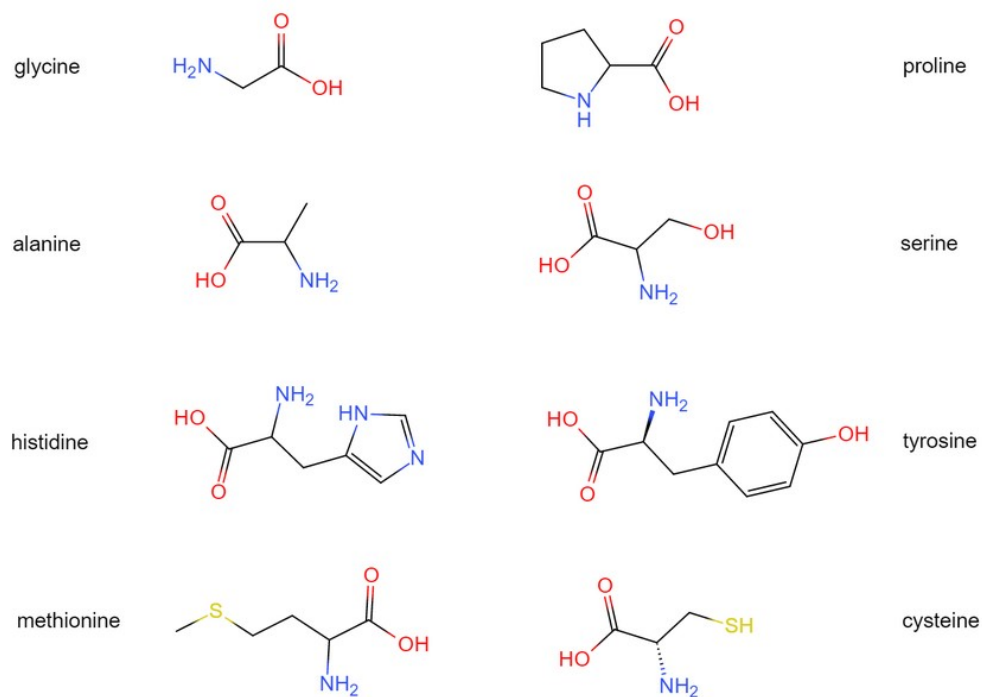

**Supplementary Scheme S6** Structures of some amino acids studied in this work

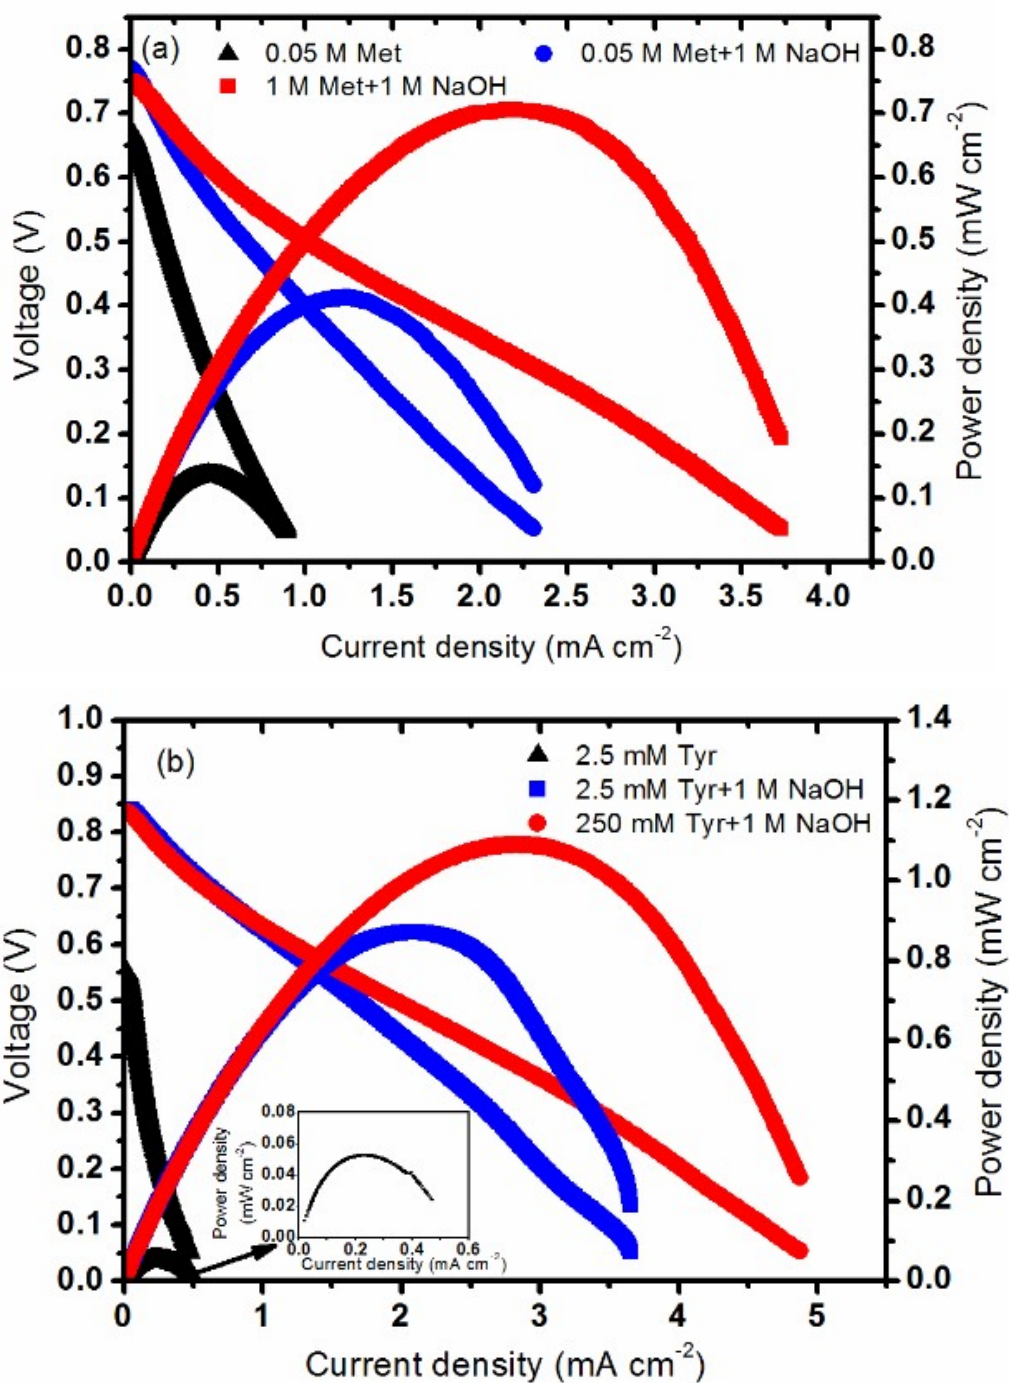

**Supplementary Figure S7** Polarization and power density plots of AAFC with NiCo/C as anode catalysts at 30 °C by using (a) 0.05 M methionine; 0.05 M methionine + 1 M NaOH; 1 M methionine + 1 M NaOH and (b) 0.05 M tyrosine; 0.05 M tyrosine +1 M NaOH; 1 M tyrosine +1 M NaOH as fuels respectively.
